# Supplementary material for: Disruption of autophagy by the histone deacetylase inhibitor MGCD0103 and its therapeutic implication in B-cell chronic lymphocytic leukemia
Source: PubMed Central journal article supplement — Leukemia. 2014 Feb 7;28(8):1636–46. doi: 10.1038/leu.2014.19 (PMC4131250; doi:10.1038/leu.2014.19), 2014-02-07
Supplement: leu201419x1.pdf [file leu201419x1.pdf]

Supplementary Figure 1

**a**

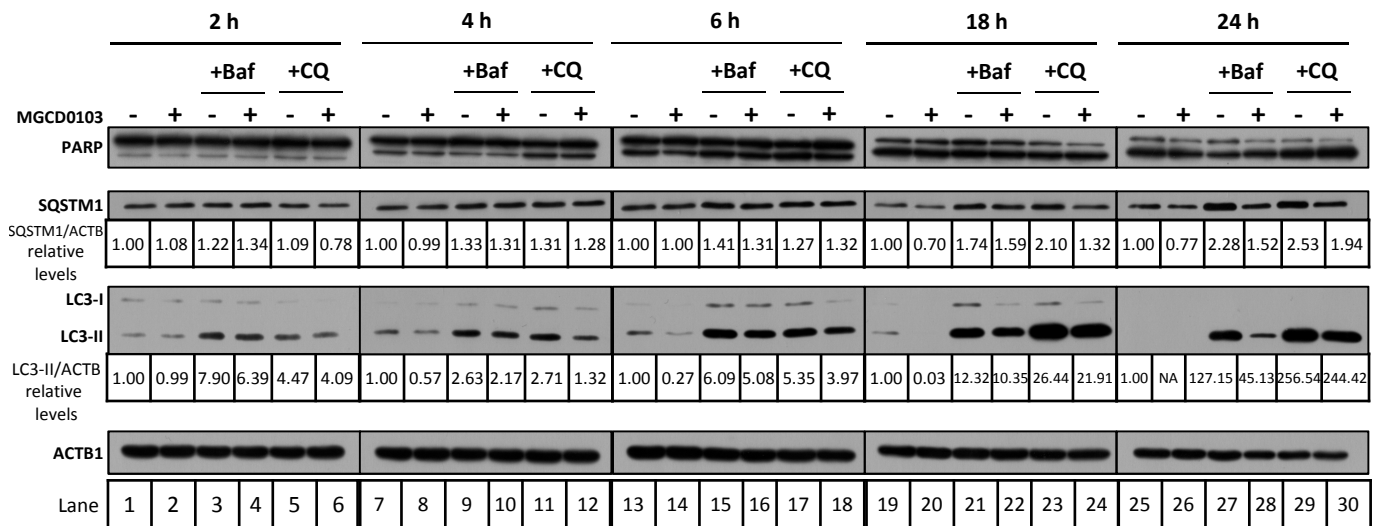

**b**

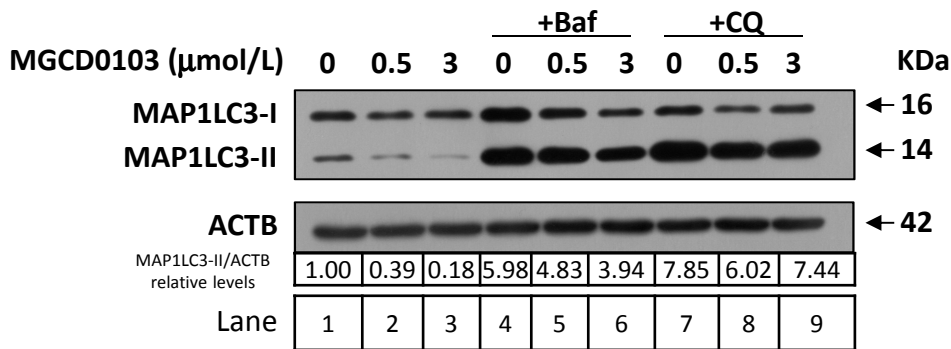

**Supplementary Figure 1.** MGCD0103 decreases the autophagic flux in primary CLL cells. **(a)** The effect of MGCD0103 (3 μmol/L) on autophagy was assessed by immunoblotting in the presence of chloroquine and bafilomycin A1, in time course experiments. One representative blots from 2 independent experiments is shown. **(b)** The effect of MGCD0103 (0.5 and 3 μmol/L) on autophagy was assessed by immunoblotting in the presence of chloroquine and bafilomycin A1 after an 18-hour treatment. One representative blots from 2 independent experiments is shown. The expression levels of proteins in treated cells relatively to the corresponding untreated control and normalized to ACTB levels are indicated.
