# Supplementary material for: Disruption of autophagy by the histone deacetylase inhibitor MGCD0103 and its therapeutic implication in B-cell chronic lymphocytic leukemia
Source: PubMed Central journal article supplement — Leukemia. 2014 Feb 7;28(8):1636–46. doi: 10.1038/leu.2014.19 (PMC4131250; doi:10.1038/leu.2014.19), 2014-02-07
Supplement: leu201419x2.pdf [file leu201419x2.pdf]

Supplementary Figure 2

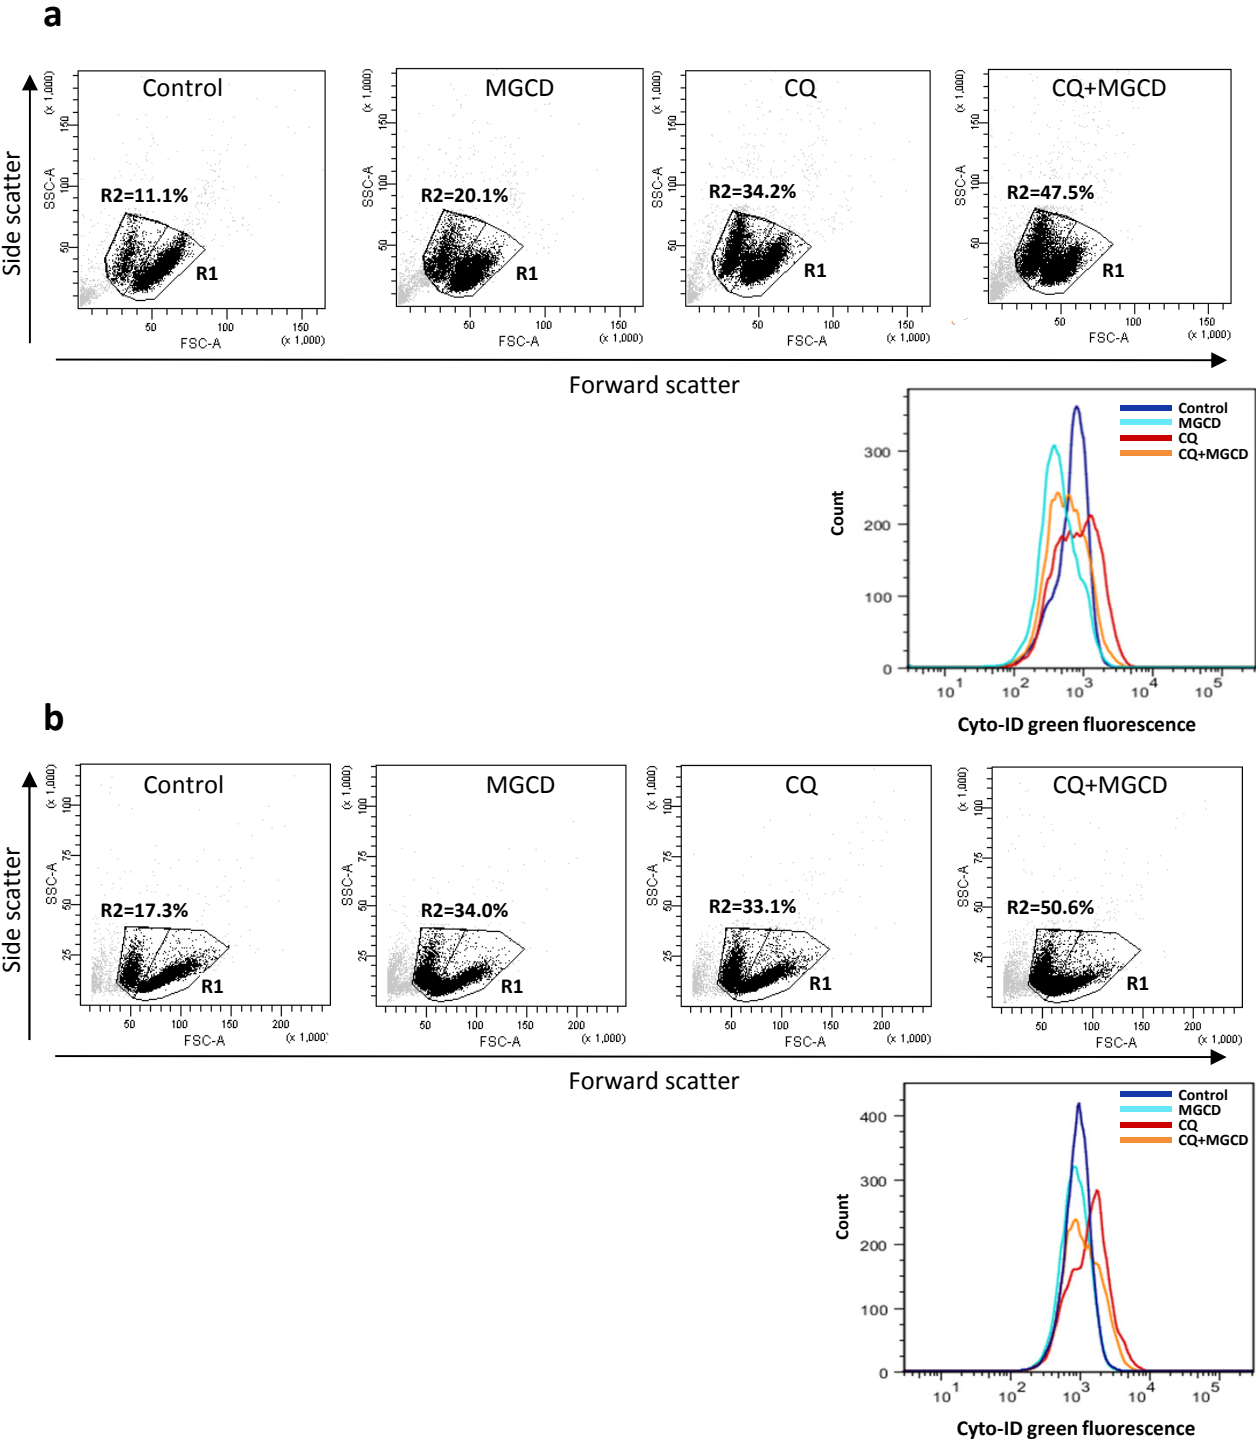

**Supplementary Figure 2.** Autophagy was assessed by flow cytometry using the Cyto-ID™ green autophagy dye. For the upper panels, single-cell lymphocyte population was gated in R1 (live and apoptotic cells), whereas apoptotic cells were gated in R2 on the basis of cell shrinkage and increase in granularity. Shown on the lower panels are the distributions of the dye green fluorescence (channel FL1) within each R1 population. Dot plots and Cyto-ID™ green fluorescence intensity from two experiments are shown in (a) and (b)
