# Supplementary material for: Disruption of autophagy by the histone deacetylase inhibitor MGCD0103 and its therapeutic implication in B-cell chronic lymphocytic leukemia
Source: PubMed Central journal article supplement — Leukemia. 2014 Feb 7;28(8):1636–46. doi: 10.1038/leu.2014.19 (PMC4131250; doi:10.1038/leu.2014.19), 2014-02-07
Supplement: leu201419x5.pdf [file leu201419x5.pdf]

Supplementary Figure 5

**a**

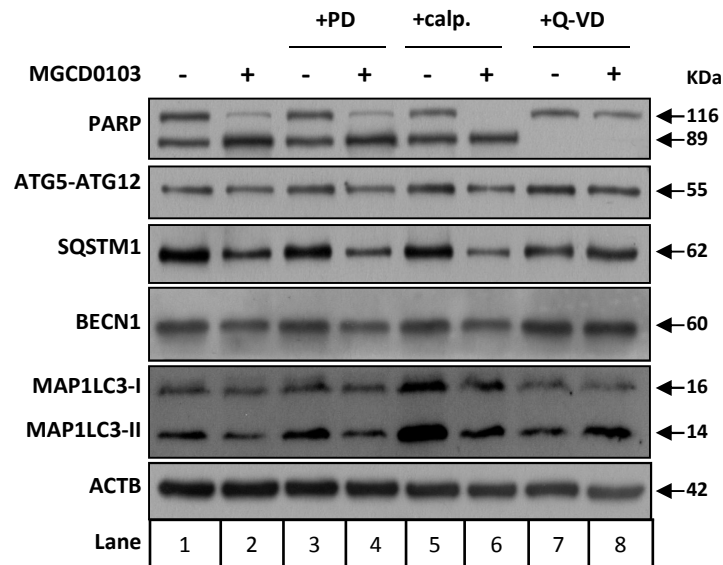

**b**

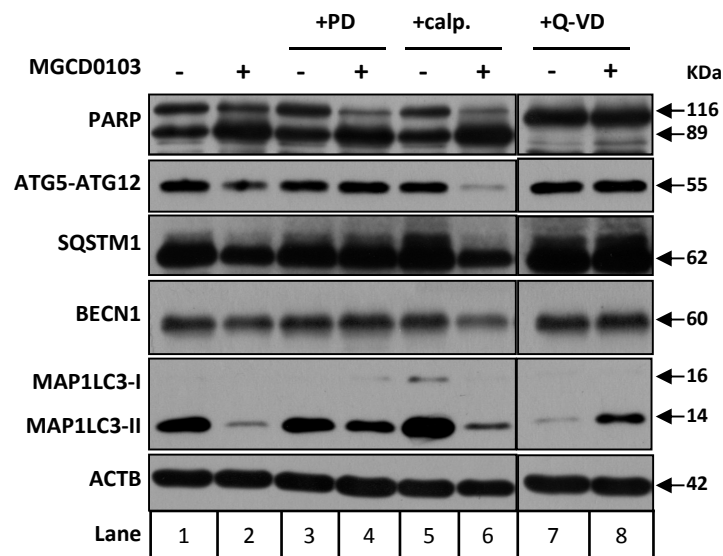

**Supplementary Figure 5.** Activation of CAPN1 is involved in the inhibition of autophagy induced by MGCD0103 in cells from some CLL samples. PBMC were incubated alone or in the presence of MGCD0103 and/or inhibitors of CAPN1 (PD151746 (PD) (60  $\mu\text{mol/L}$ )), CAPN1 and CAPN2 (calpeptin (calp.) 25  $\mu\text{mol/L}$ ) and caspases (Q-VD-Oph (Q-VD) (10  $\mu\text{mol/L}$ )) for 24 h, followed by protein extraction and immunoblotting analysis of the indicated autophagy actors, as well as PARP and the loading control, ACTB. Shown are representative blots, from six independent experiments, either from patient's cells unresponsive ( $n=3$ ) to calpain-1 inhibition (**a**) or from cells responsive ( $n=1$ ) to such inhibition (**b**). The cells from 2 patients showed incomplete response to PD151746, displaying partial inhibition of MAP1LC3-II or ATG5 degradation only (data not shown). Surprisingly, the effect of MGCD0103 was not suppressed by calpeptin in any of the samples tested, probably due to the extent of apoptosis induced by calpeptin under these conditions.
