# Supplementary material for: Disruption of autophagy by the histone deacetylase inhibitor MGCD0103 and its therapeutic implication in B-cell chronic lymphocytic leukemia
Source: PubMed Central journal article supplement — Leukemia. 2014 Feb 7;28(8):1636–46. doi: 10.1038/leu.2014.19 (PMC4131250; doi:10.1038/leu.2014.19), 2014-02-07
Supplement: leu201419x7.pdf [file leu201419x7.pdf]

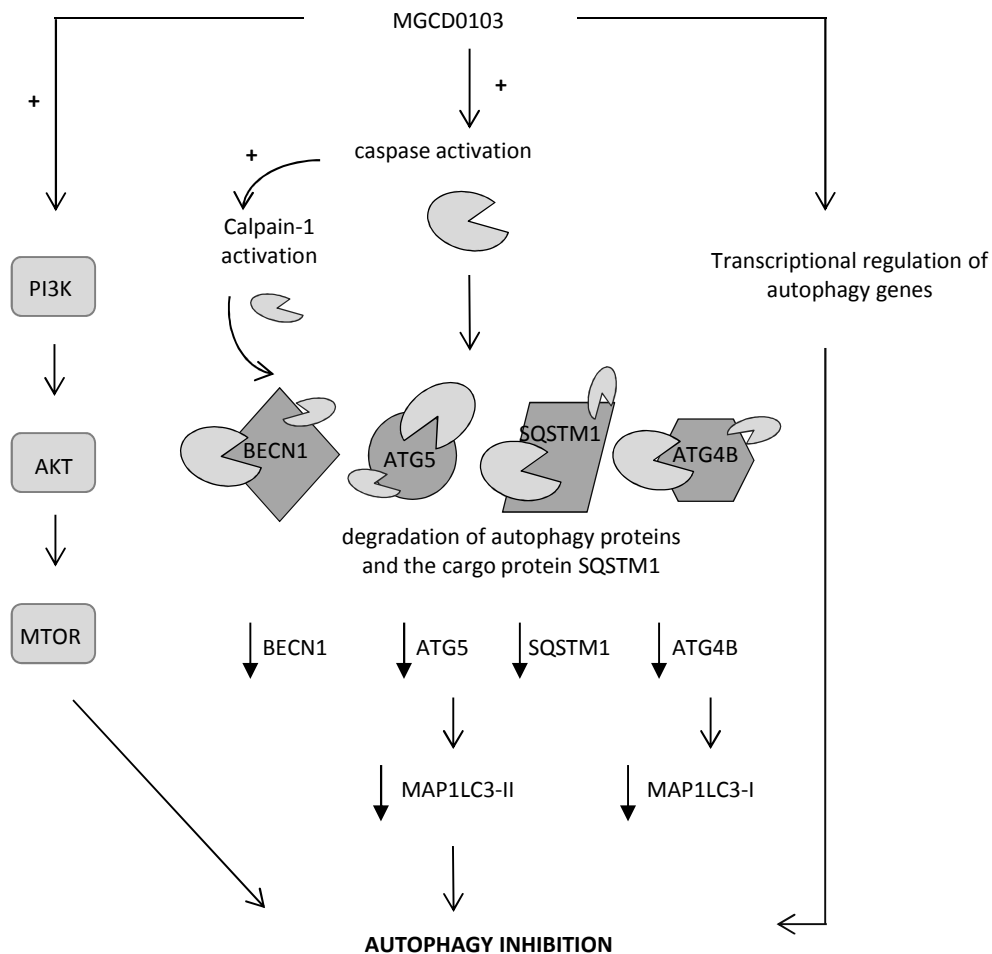

**Supplementary Figure 7.** A model for the inhibition of autophagy induced by MGCD0103 in primary CLL cells. MGCD0103 rapidly activates the PI3K/AKT/MTOR pathway, thus inhibiting autophagy at early time points. After onset of apoptosis, MGCD0103-induced caspase activation triggers the cleavage of key autophagy-related proteins, namely BECN1, ATG5, SQSTM1 and ATG4B, thus inhibiting autophagy at later time points. In cells from at least some CLL patients, caspase-mediated activation of calpain-1 is also involved in these cleavage processes. MGCD0103 modulates the expression of several autophagy-related genes at the transcriptional level, which may participate in the inhibition of the autophagic process.
