# Supplementary material for: Disruption of autophagy by the histone deacetylase inhibitor MGCD0103 and its therapeutic implication in B-cell chronic lymphocytic leukemia
Source: PubMed Central journal article supplement — Leukemia. 2014 Feb 7;28(8):1636–46. doi: 10.1038/leu.2014.19 (PMC4131250; doi:10.1038/leu.2014.19), 2014-02-07
Supplement: leu201419x9.pdf [file leu201419x9.pdf]

**Supplementary Tables 2.** Relative quantification of phosphoprotein levels in Figure 3

Quantification of **phosphoprotein/actin** in MGCD0103-treated cells relatively to the control in **Figure 3a**

| Treatment duration | p-AKT(S473)/Actin | p-MTOR/Actin | p-EIF4EBP1 (Thr37/46)/Actin |
|--------------------|-------------------|--------------|-----------------------------|
| 2h                 | 1.74              | 1.00         | 1.38                        |
| 4h                 | 1.16              | 1.23         | 0.66                        |
| 6h                 | 0.93              | 1.29         | 0.29                        |
| 21h                | 0.29              | 0.93         | 0.45                        |
| 32h                | 0.02              | 0.21         | 0.02                        |

Quantification of **phosphoprotein/total protein** in MGCD0103-treated cells relatively to the control in **Figure 3a**

| Treatment duration | p-AKT(S473)/AKT | p-MTOR/MTOR | p-EIF4EBP1 (Thr37/46)/EIF4EBP1 |
|--------------------|-----------------|-------------|--------------------------------|
| 2h                 | 1.73            | 1.00        | 1.05                           |
| 4h                 | 1.29            | 1.56        | 0.63                           |
| 6h                 | 1.24            | 1.56        | 0.41                           |
| 21h                | 0.31            | 1.11        | 0.48                           |
| 32h                | 0.06            | 0.34        | 0.09                           |

Quantification of **phosphoprotein/actin** in MGCD0103-treated cells relatively to the control in **Figure 3b**

| MGCD0103 concentration | p-AKT(Thr308)/Actin | p-AKT(S473)/Actin | p-MTOR/Actin | p-EIF4EBP1 (Thr37/46)/Actin |
|------------------------|---------------------|-------------------|--------------|-----------------------------|
| 0.5 uM                 | 1.67                | 0.87              | 1.42         | 3.22                        |
| 3 uM                   | 0.32                | 0.49              | 0.93         | 0.77                        |

Quantification of **phosphoprotein/total protein** in MGCD0103-treated cells relatively to the control in **Figure 3b**

| MGCD0103 concentration | p-AKT(Thr308)/AKT | p-AKT(S473)/AKT | p-MTOR/MTOR | p-EIF4EBP1 (Thr37/46)/EIF4EBP1 |
|------------------------|-------------------|-----------------|-------------|--------------------------------|
| 0.5 uM                 | 1.88              | 0.98            | 1.63        | 4.39                           |
| 3 uM                   | 0.63              | 0.95            | 1.48        | 1.08                           |
