# Supplementary material for: Disruption of autophagy by the histone deacetylase inhibitor MGCD0103 and its therapeutic implication in B-cell chronic lymphocytic leukemia
Source: PubMed Central journal article supplement — Leukemia. 2014 Feb 7;28(8):1636–46. doi: 10.1038/leu.2014.19 (PMC4131250; doi:10.1038/leu.2014.19), 2014-02-07
Supplement: leu201419x10.pdf [file leu201419x10.pdf]

**Supplementary Table 3.** Combination Index (CI) values of drug associations highlighted in Figure 7 and their biological description

| CI values | MG0.4 | MG0.4 | MG0.1  | MG0.2  | MG0.4  | MG0.1  | MG0.2  | MG0.4  | VPA1 | VPA1 | VPA1   | VPA1   | Range | Description |                        |                     |
|-----------|-------|-------|--------|--------|--------|--------|--------|--------|------|------|--------|--------|-------|-------------|------------------------|---------------------|
|           | CQ5   | CQ10  | 3MA0.3 | 3MA0.3 | 3MA0.3 | 3MA0.6 | 3MA0.6 | 3MA0.6 | CQ5  | CQ10 | 3MA0.3 | 3MA0.6 | of CI |             |                        |                     |
|           |       |       |        |        |        |        |        |        |      |      |        |        |       | <0.1        | Very strong synergism  |                     |
|           |       |       |        |        |        |        |        |        |      |      |        |        |       | 0.1-0.3     | Strong synergism       |                     |
|           |       |       |        | 0.63   | 0.67   | 0.69   | 0.58   | 0.56   |      |      |        |        |       | 0.3-0.7     | Synergism              |                     |
|           |       |       |        |        |        |        |        |        |      |      |        |        |       | 0.7-0.85    | Moderate synergism     |                     |
|           |       |       | 0.89   |        |        |        |        |        |      |      |        | 0.88   |       | 0.85-0.90   | Slight synergism       |                     |
|           | 1.02  | 0.91  |        |        |        |        |        |        |      |      | 0.99   |        | 0.96  | 0.90-1.1    | Nearly additive        |                     |
|           |       |       |        |        |        |        |        |        |      | 1.14 |        |        |       |             | 1.1-1.2                | Slight antagonism   |
|           |       |       |        |        |        |        |        |        |      |      |        |        |       |             | 1.2-1.45               | Moderate antagonism |
|           |       |       |        |        |        |        |        |        |      |      |        |        |       | 1.45-3.3    | Antagonism             |                     |
|           |       |       |        |        |        |        |        |        |      |      |        |        |       | 3.3-10      | Strong antagonism      |                     |
|           |       |       |        |        |        |        |        |        |      |      |        |        |       | >10         | Very strong antagonism |                     |

Description of synergism or antagonism in drug combination is based on the median-effect method of Chou and Talalay<sup>19</sup>

MG = MGCD0103

VPA = valproic acid

CQ = chloroquine

3MA= 3-methyladenine

Concentrations used are indicated after drug abbreviations and are expressed in  $\mu\text{mol/L}$  for MG and CQ, and in  $\text{mmol/L}$  for VPA and 3MA
